# Supplementary material for: Computational study of esterification between succinic acid and ethylene glycol in the absence of foreign catalyst and solvent
Source: Royal Society of Chemistry journal article supplement (doi:10.1039/c0py00381f), 2011-01-01
Supplement: c0py00381f.pdf [file c0py00381f.pdf]

## Electronic Supplementary Information

### Key Bond Lengths of Transition States

TsA

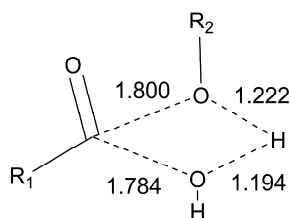

TsB1

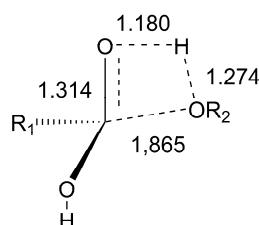

TsB2

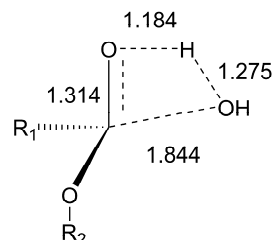

TSc1

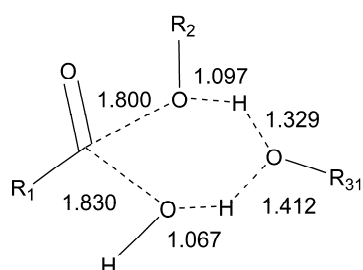

TSd11

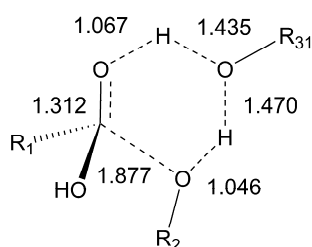

TSd12

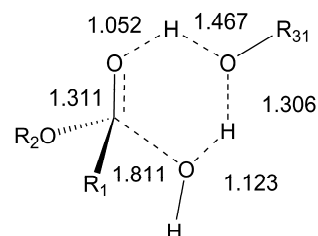

TSc2

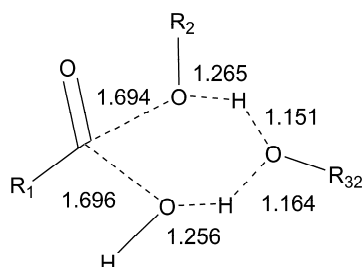

TSd21

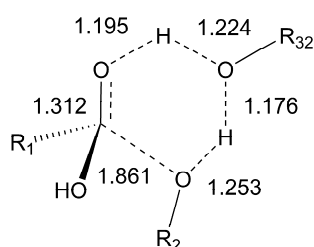

TSd22

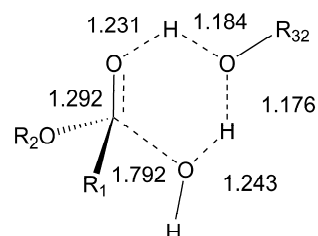

TSc3

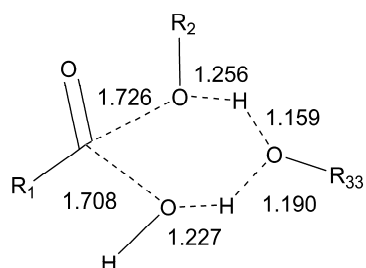

TSd31

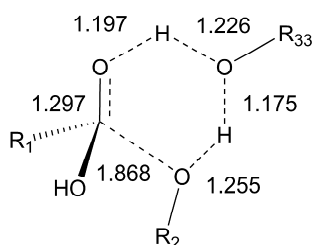

TSd32

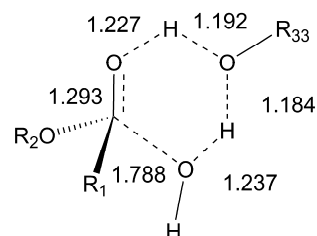

The unit of bond lengths is Å.

## Potential Energy Profiles of Four Reverse Channels

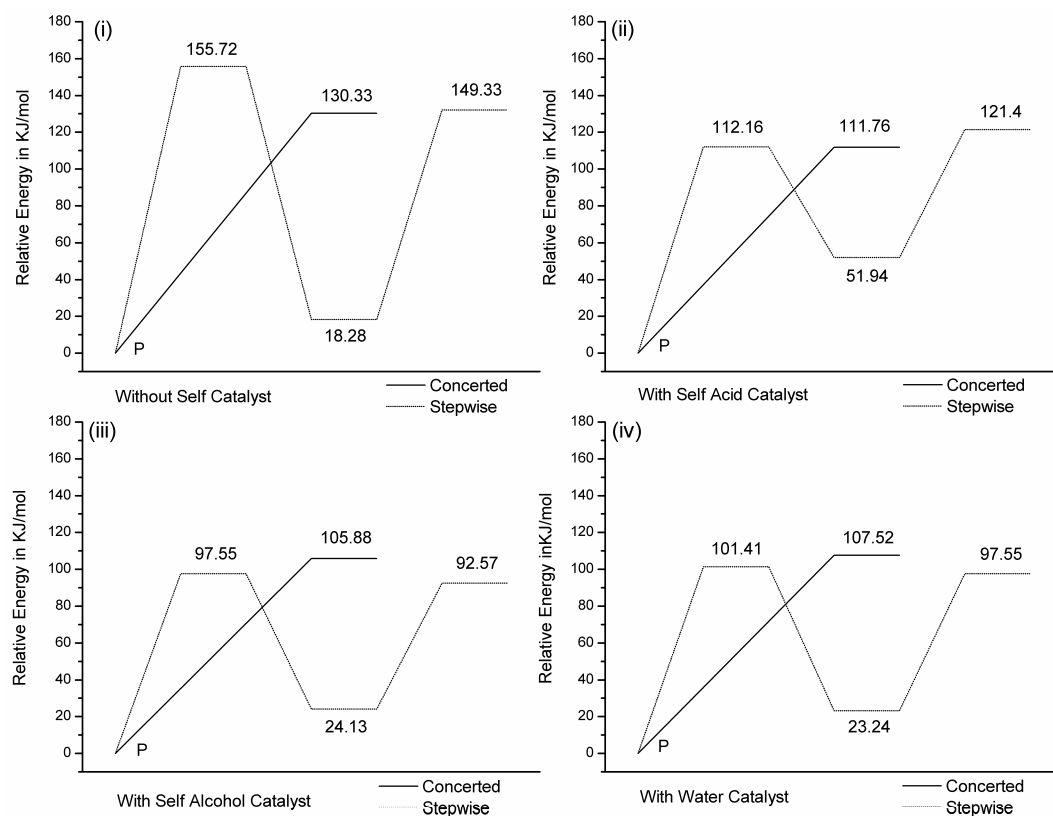

(i) In the absence of self catalyst. (ii) In the present of self acid catalyst. (iii) In the presence of self alcohol. (iv) In the presence of water catalyst. Solid line: concerted. Dotted line: stepwise.
